# Supplementary figures and images for: A hyperparasite affects the population dynamics of a wild plant pathogen
Source: PubMed Central journal article supplement — Mol Ecol. 2014 Oct 8;23(23):5877–87. doi: 10.1111/mec.12908 (PMC4282315; doi:10.1111/mec.12908), 2014-10-08

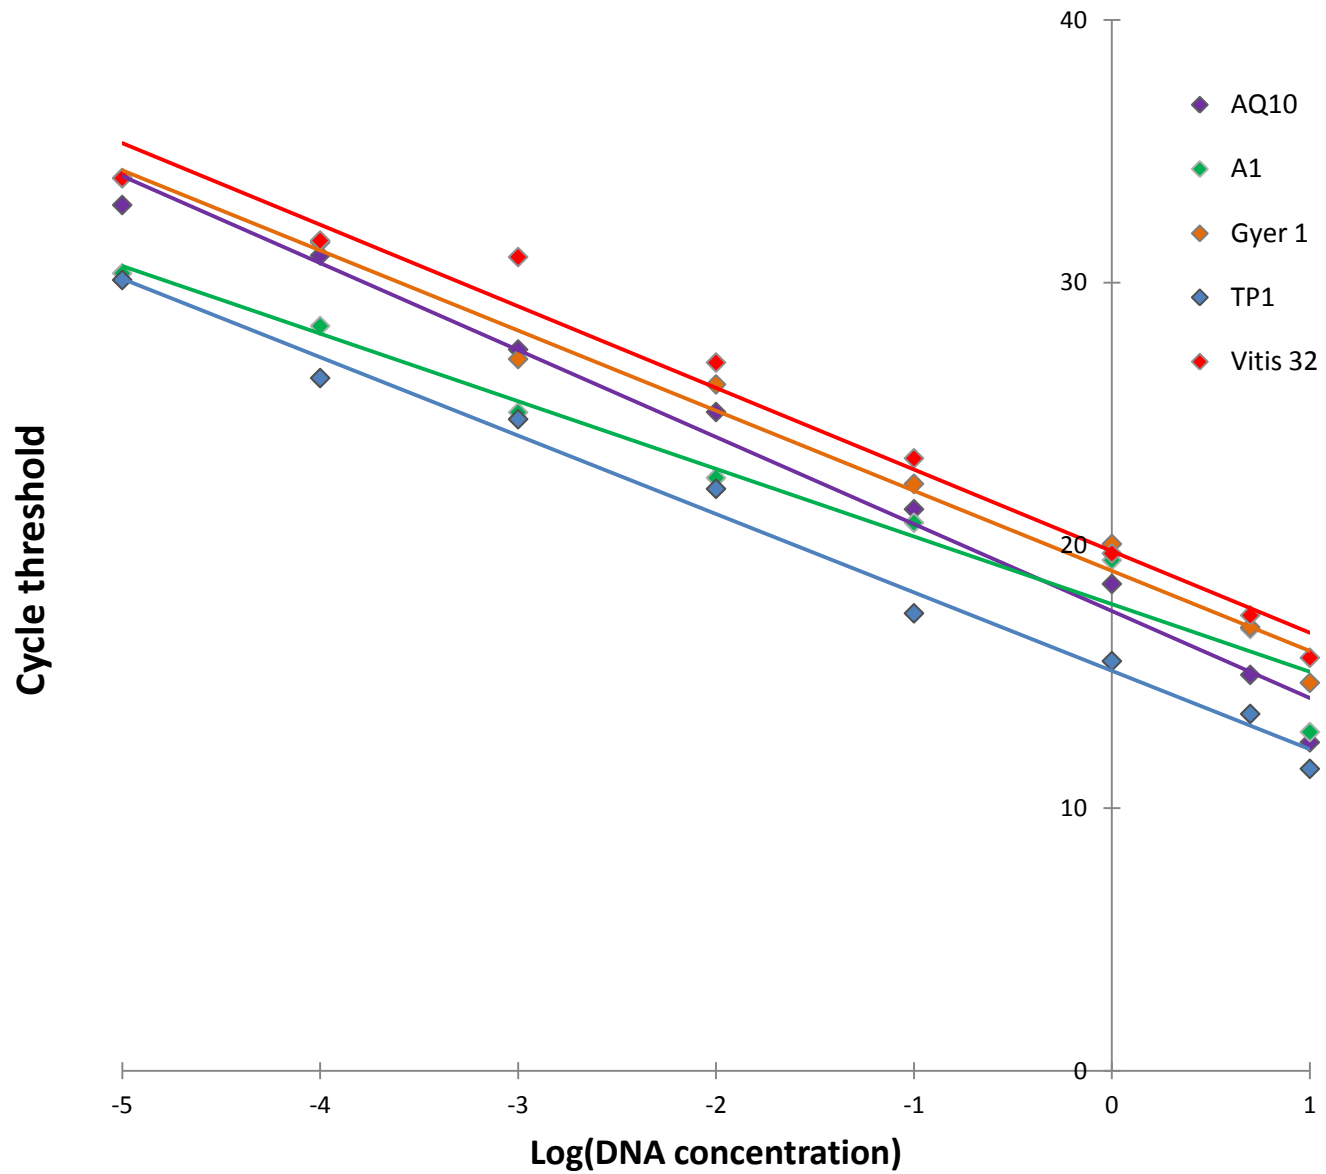

Supplement: mec0023-5877-SD3.pdf [file mec0023-5877-SD3.pdf]

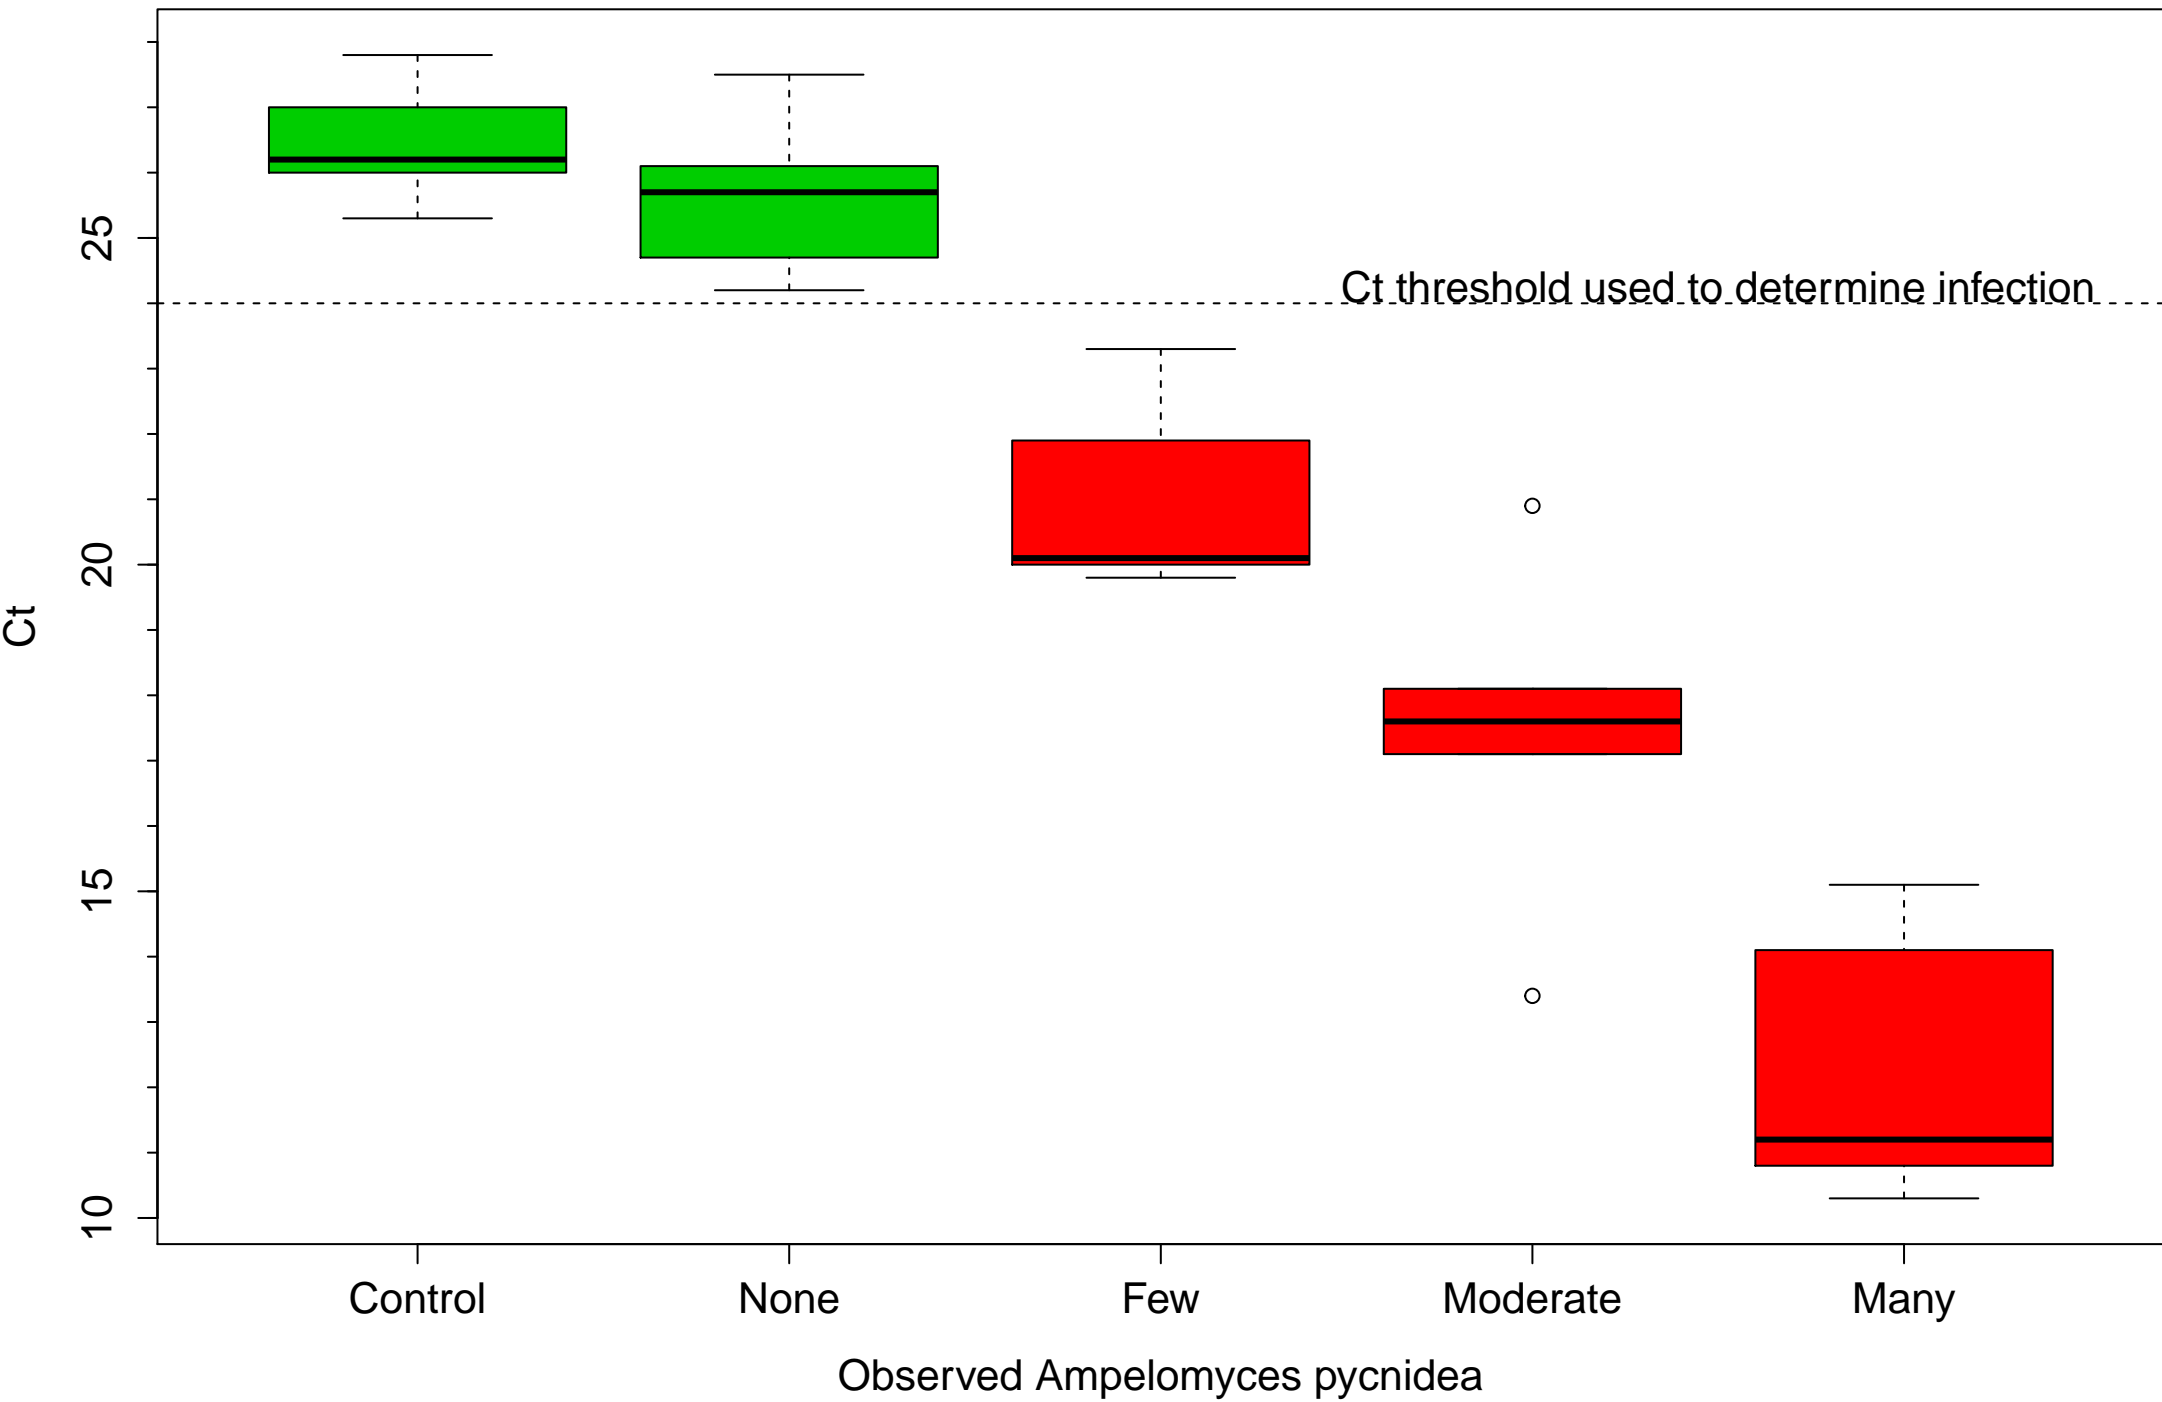

Supplement: mec0023-5877-SD4.pdf [file mec0023-5877-SD4.pdf]
